# Supplementary material
Source: Springer Nature journal article supplement (https://www.springermedizin.de/resource/supplementary/12916_2010_375_MOESM1_ESM.pdf/9599822)
Supplement: MOESM1 [file 9599822]

Health Survey for England  
1998  
(White British)

Health Survey for England  
1999  
(Other ethnic groups)

|                             | N           | %           | %           |
|-----------------------------|-------------|-------------|-------------|
| Total names issued HSE      | 7009        | 100         |             |
| Not eligible                | 738         | 10.5        |             |
| <b>Total in scope</b>       | <b>6271</b> | <b>89.4</b> | <b>100</b>  |
| Refusal                     | 1473        |             | 23          |
| No contact                  | 241         |             | 3.8         |
| Other non response          | 276         |             | 4.4         |
| <b>Total EMPIRIC sample</b> | <b>4281</b> |             | <b>68.2</b> |

### Linked survey questions used in this study

#### HSE (1998/9)

Ethnic group  
Physical inactivity  
Physical illnesses

#### EMPIRIC (2000)

Age, Gender, Employment, Education  
CIS-R questions: CFS (N=108); CF (N=881)  
CIS-R measures anxiety & depression  
Perceived discrimination  
Social Strain & Social Support
